# Supplementary material
Source: MDPI journal article supplement (https://www.mdpi.com/2073-4352/9/11/605)
Supplement: s1 [file s1]

**Table S1.** Thermal expansion coefficients  $\alpha$  of substrate materials and  $\kappa$ -Br at room temperature.

|                            | Si | Nb-doped<br>SrTiO <sub>3</sub> (STO) | CaF <sub>2</sub> | $\kappa$ -Br            |
|----------------------------|----|--------------------------------------|------------------|-------------------------|
| $\alpha/\text{ppm K}^{-1}$ | 2  | 11                                   | 19               | 30–60<br>(in-plane)[S1] |

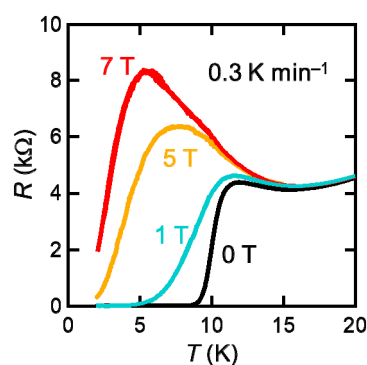

**Figure S1.** Low-temperature resistance of **device1** under magnetic field. The cooling rate is  $0.3 \text{ K min}^{-1}$ . Insulating behavior under strong magnetic field indicates that the ground state of **device1** is not full SC phase but PSC phase where SC state is mixed with Mott insulating state.

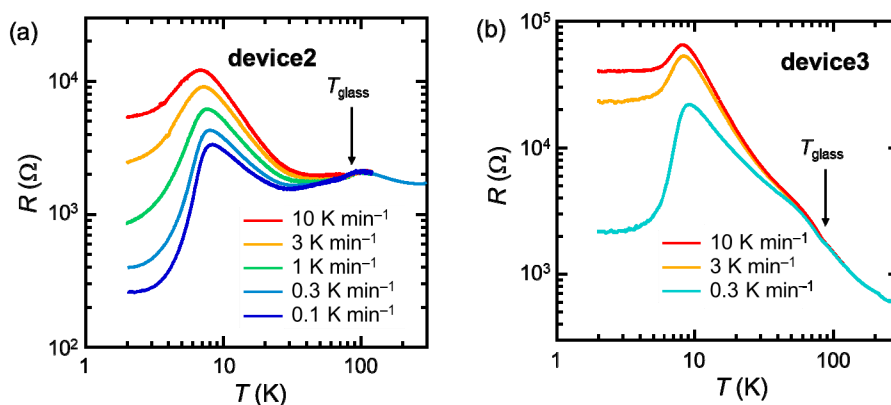

**Figure S2.** Temperature dependence of resistance in **device2** (a) and **device3** (b) at different cooling rate. Cooling rate was controlled at 120 or 100 K. Resistance difference was observed below  $\sim 80 \text{ K}$ , attributed to glass transition of terminal ethylene group of BEDT-TTF in  $\kappa$ -Br.

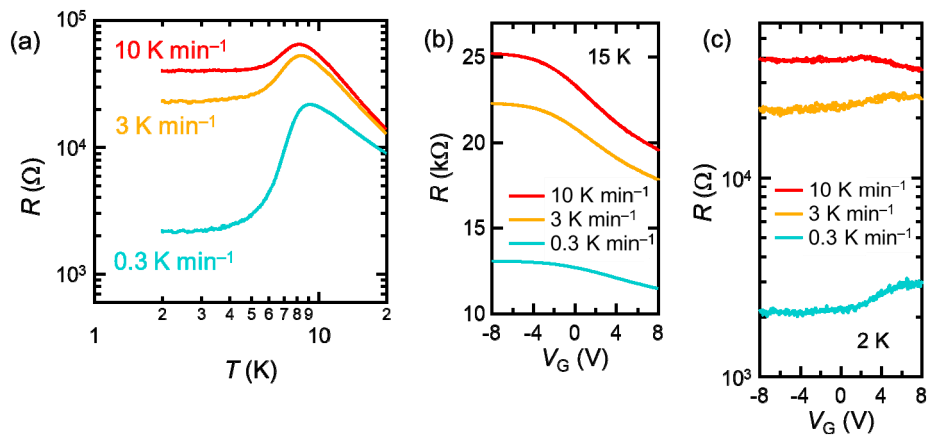

**Figure S3.** Cooling-rate dependence of low-temperature resistance (a) and FET properties above  $T_c$  (b) and below  $T_c$  (c) in **device3**. Only n-type behavior was observed above  $T_c$  (b) and field effect polarity changed below  $T_c$  by cooling rate difference (c).

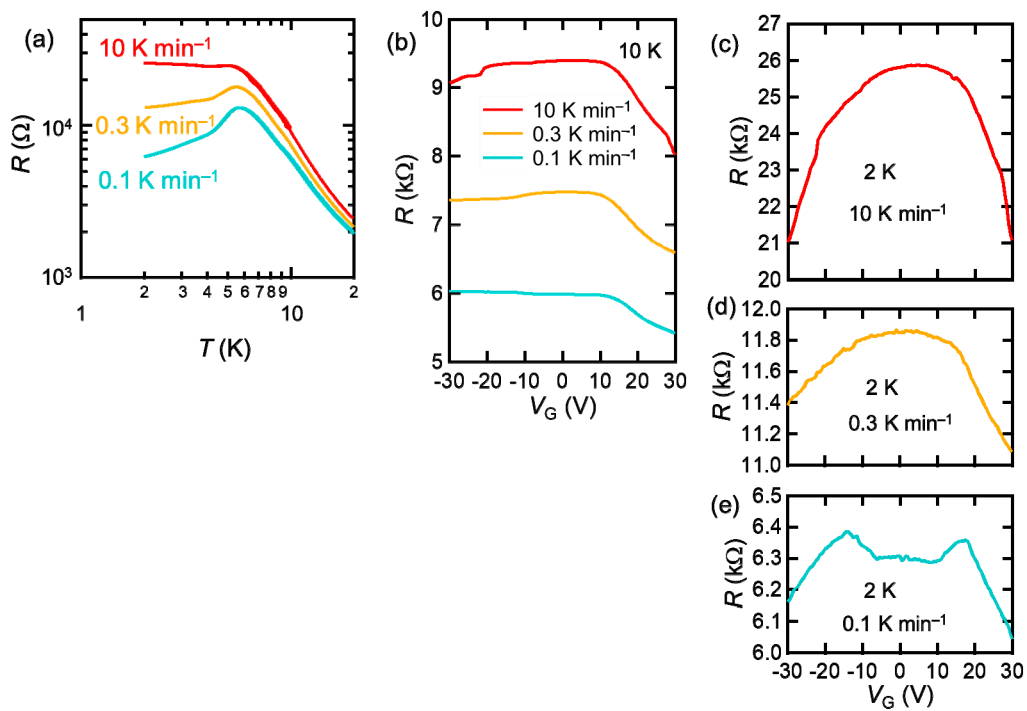

**Figure S4.** Cooling-rate dependence of low-temperature resistance (a) and FET properties above  $T_c$  (b) and below  $T_c$  (c)–(e) in **device4**. We observed ambipolar behavior typical to Mott FET (b)–(d) and field effect derived from small intrinsic SC portion in the half-filled state (e).

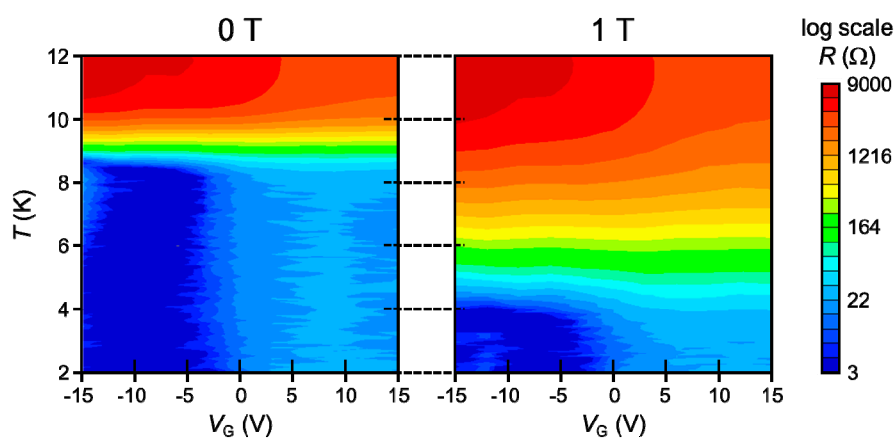

**Figure S5.** Color plots of resistance of **device1** below 12 K against  $V_G$  and temperature at cooling rates of  $0.3 \text{ K min}^{-1}$  at 0 T (left) and 1 T (right).

### Supplementary References

- S1. Kund, M.; Muller, H.; Biberacher, W.; Andres, K.; Saito, G. Anomalous thermal expansion of the organic superconductor  $\kappa$ -(BEDT-TTF) $_2$ Cu[N(CN) $_2$ ]Br. *Physica B* **1993**, *191*, 274–280.

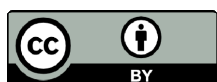

© 2019 by the authors. Submitted for possible open access publication under the terms and conditions of the Creative Commons Attribution (CC BY) license (<http://creativecommons.org/licenses/by/4.0/>).
